# Supplementary material for: Reactogenicity and safety of a liquid human rotavirus vaccine (RIX4414) in healthy adults, children and infants in China: Randomized, double-blind, placebo-controlled Phase I studies
Source: PubMed Central journal article supplement — Hum Vaccin Immunother. 2013 Jun 4;9(8):1638–42. doi: 10.4161/hv.25076 (PMC3906260; doi:10.4161/hv.25076), 2013-06-04
Supplement: hvi-9-1638-s01.pdf [file hvi-9-1638-s01.pdf]

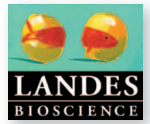

## **Supplemental Material to:**

**Rong-Cheng Li, Yan-Ping Li, Zhao-Jun Mo, Dong Luo, Teng Huang, Ji-Lian Kong, Lao-Hong Wang, Ning-Sheng Song, Aixue Liu, Helen Zhang, Xueyan Liao, Naveen Karkada and Htay Htay Han**

**Reactogenicity and safety of a liquid human rotavirus vaccine (RIX4414) in healthy adults, children and infants in China: Randomized, double-blind, placebo-controlled Phase I studies**

**2013; 9(8)**

**<http://dx.doi.org/10.4161/hv.25076>**

**[www.landesbioscience.com/journals/vaccines/article/25076](http://www.landesbioscience.com/journals/vaccines/article/25076)**

**Table S1.** Percentage of children reporting each solicited AE during the 8-day follow-up period (day 0–7) after vaccination (all and grade 3 intensity) (ROTA-073 pediatric study; TVC)

|                                         | Human RV vaccine<br>(N = 25) |            | Placebo<br>(N = 25) |            |
|-----------------------------------------|------------------------------|------------|---------------------|------------|
|                                         | n (%)                        | 95% CI     | n (%)               | 95% CI     |
| Cough                                   |                              |            |                     |            |
| All                                     | 10 (40)                      | 21.1, 61.3 | 12 (48)             | 27.8, 68.7 |
| Grade 3                                 | 0 (0)                        | 0.0, 13.7  | 0 (0)               | 0.0, 13.7  |
| Diarrhea                                |                              |            |                     |            |
| All                                     | 1 (4)                        | 0.1, 20.4  | 1 (4)               | 0.1, 20.4  |
| Grade 3                                 | 0 (0)                        | 0.0, 13.7  | 1 (4)               | 0.1, 20.4  |
| Irritability                            |                              |            |                     |            |
| All                                     | 3 (12)                       | 2.5, 31.2  | 2 (8)               | 1.0, 26.0  |
| Grade 3                                 | 0 (0)                        | 0.0, 13.7  | 0 (0)               | 0.0, 13.7  |
| Loss of appetite                        |                              |            |                     |            |
| All                                     | 2 (8)                        | 1.0, 26.0  | 3 (12)              | 2.5, 31.2  |
| Grade 3                                 | 0 (0)                        | 0.0, 13.7  | 0 (0)               | 0.0, 13.7  |
| Fever (WHO scale)                       |                              |            |                     |            |
| All ( $\geq 37.5^{\circ}\text{C}$ )     | 4 (16)                       | 4.5, 36.1  | 5 (20)              | 6.8, 40.7  |
| Grade 3 ( $\geq 39.0^{\circ}\text{C}$ ) | 0 (0)                        | 0.0, 13.7  | 0 (0)               | 0.0, 13.7  |
| Fever (Chinese scale)                   |                              |            |                     |            |
| All ( $\geq 37.1^{\circ}\text{C}$ )     | 1 (4)                        | 0.1, 20.4  | 2 (8)               | 1.0, 26.0  |
| Grade 3 ( $\geq 39.0^{\circ}\text{C}$ ) | 0 (0)                        | 0.0, 13.7  | 0 (0)               | 0.0, 13.7  |
| Vomiting                                |                              |            |                     |            |
| All                                     | 1 (4)                        | 0.1, 20.4  | 0 (0)               | 0.0, 13.7  |
| Grade 3                                 | 0 (0)                        | 0.0, 13.7  | 0 (0)               | 0.0, 13.7  |

Grade 3 AEs defined as cough which prevented normal daily activity,  $\geq 6$  looser than normal stools per day, crying that could not be comforted or which prevented normal daily activity, not eating at all, and  $\geq 3$  episodes of vomiting/day

95% CI, 95% confidence interval
